# Supplementary material for: Directed differentiation of functional corticospinal-like neurons from endogenous SOX6+/NG2+ cortical progenitors
Source: eLife. 2026 Jan 27;13:RP100340. doi: 10.7554/eLife.100340 (PMC12844902; doi:10.7554/eLife.100340)
Supplement: Supplementary file 2. [file elife-100340-supp2.xlsx]

## Sheet: Sheet1
	List of qPCR primers
	Actb_F	AGGGTGTGATGGTGGGAATG
	Actb_R	GGTGTGGTGCCAGATCTTCT
	CD146_F	CCCCATTCCTCAAGTCCTATG
	CD146_R	TTGTCTTCCTTAACTAGGCGTG
	Gfap_F	GAAAACCGCATCACCATTCC
	Gfap_R	CTTAATGACCTCACCATCCCG
	Mbp_F	CCACTCTTGAACACCCCATTG
	Mbp_R	TTGCCCACGCTTCTCTTC
	Cspg4_F	CCTTCACGATCACCATCCTTC
	Cspg4_R	AATCATTGTCTGTTCCCCTGAG
	Olig2_F	GCGAGCACCTCAAATCTAATTC
	Olig2_R	AAAAGATCATCGGGTTCTGGG
	Pdgfrb_F	CATTCCTTGCCCTTCAAAGTG
	Pdgfrb_R	AGACTCAATGACCTTCCATCG
	Sox6_F	AGGCGATTTACCAGTGACTTC
	Sox6_R	CCCTCTTCCTTTTCCCTTGAG
	Tuj1_F	CCTGCCTTTTCGTCTCTAGC
	Tuj1_R	CCCTACATAGTTGCCGCTG
